# Supplementary material for: Research on the Application of CBL Combined with OSCE in the Teaching of Anorectal Standardized Training Physician of Traditional Chinese Medicine
Source: Research Square preprint supplement (doi:10.21203/rs.3.rs-7287583/v1), 2025-09-18
Supplement: Supplementary file 1 [file e876a5253efcecf92f8fa27b.docx]

## **English Version of the Two Instruments Developed for the Study (1) Teaching-Satisfaction Questionnaire (2) Clinical-Thinking-Ability Rating Scale**

INSTRUCTIONS
All items use a 5-point Likert response.
Circle the ONE option that best reflects your opinion.
There are no right or wrong answers.

1.Teaching-Satisfaction Questionnaire (TSQ-4) Purpose: To assess residents’ satisfaction with the teaching programme.

Section A – Demographics
A1. Gender: □ Male □ Female □ Prefer not to say
A2. Age: ______ years
A3. Training group: □ CBL+OSCE □ Traditional teaching

Section B – Satisfaction Items
For each statement below, please indicate your level of agreement.

| No. | Statement | Response Options (circle one) |
| --- | --- | --- |
| 1 | The teaching methods used in this rotation stimulated my interest in learning. | 1 = Very dissatisfied 2 = Dissatisfied 3 = Neutral 4 = Satisfied 5 = Very satisfied |
| 2 | The content covered was relevant to my future clinical practice. | 1 2 3 4 5 |
| 3 | The overall teaching effect met my expectations. | 1 2 3 4 5 |
| 4 | The teacher’s instructional competence was high. | 1 2 3 4 5 |

Scoring: Sum the four item scores (range 4–20). Higher scores indicate greater satisfaction.

2. Clinical-Thinking-Ability Rating Scale (CTARS-4) Purpose: To evaluate residents’ clinical-thinking performance as judged by supervising physicians.

Section A – Resident Information
Name (optional): ____________________
Rotation start date: ____ / ____ / 202__

Section B – Rating Items
For each dimension below, please select the level that best describes the resident’s usual performance during the rotation.

| Dimension (definition) | Response Options (circle one) |
| --- | --- |
| 1. Problem analysis – ability to identify key clinical issues from history, data, and investigations. | 1 = Completely inconsistent 2 = Inconsistent 3 = Neutral 4 = Consistent 5 = Completely consistent |
| 2. Diagnostic reasoning – logical derivation and prioritisation of differential diagnoses. | 1 2 3 4 5 |
| 3. Treatment decision-making – evidence-based and individualised therapeutic choices. | 1 2 3 4 5 |
| 4. Patient-condition assessment – ongoing evaluation and adjustment of management plans. | 1 2 3 4 5 |

Scoring: Sum the four dimension scores (range 4–20). Higher scores indicate stronger clinical-thinking ability.
